# Supplementary material for: Oasis Evolution in Response to Human Inducedwater Resources Reallocation in South Xinjiang during Past Four Decades
Source: Preprints.org preprint supplement (doi:10.20944/preprints201910.0184.v1), 2019-10-16
Supplement: Supplementary file 1 [file supplementary]

Table S1

| Path | Row | Acquisition data |
| --- | --- | --- |
| 152 | 033 | 07/01/1973 |
| 153 | 032 | 10/05/1972 |
| 153 | 033 | 11/28/1972 |
| 154 | 031 | 07/03/1973 |
| 154 | 033 | 10/19/1973 |
| 154 | 034 | 06/21/1977 |
| 155 | 031 | 10/20/1973 |
| 155 | 034 | 06/22/1977 |
| 156 | 031 | 10/08/1972 |
| 156 | 032 | 02/19/1974 |
| 156 | 034 | 06/23/1977 |
| 156 | 035 | 02/17/1977 |
| 157 | 031 | 10/27/1972 |
| 157 | 032 | 10/27/1972 |
| 157 | 033 | 10/27/1972 |
| 157 | 034 | 07/24/1973 |
| 158 | 031 | 10/16/1976 |
| 158 | 032 | 09/28/1976 |
| 158 | 033 | 10/04/1975 |
| 158 | 034 | 09/17/1973 |
| 159 | 032 | 09/18/1973 |
| 159 | 033 | 08/06/1973 |
| 159 | 034 | 08/12/1975 |
| 160 | 032 | 08/13/1975 |
| 160 | 033 | 08/20/1977 |
| 160 | 034 | 08/20/1977 |

Table S2

| **Path** | **Row** | **Acquisition data** | | | | |
| --- | --- | --- | --- | --- | --- | --- |
| **1990s** | **2000s** | **2005s** | **2010s** | **2014** |
| 141 | 033 | 09/16/1990 | 10/08/2001 | 09/01/2005 | 08/14/2010 | 09/18/2014 |
| 142 | 032 | 10/09/1990 | 09/29/2001 | 08/10/2006 | 08/18/2009 | 07/23/2014 |
| 142 | 033 | 09/07/1990 | 07/11/2001 | 09/27/2006 | 09/06/2010 | 08/24/2014 |
| 143 | 031 | 10/16/1990 | 09/17/2000 | 08/14/2005 | 08/20/2010 | 08/31/2014 |
| 143 | 033 | 10/16/1990 | 09/17/2000 | 09/15/2005 | 09/26/2009 | 08/15/2014 |
| 143 | 034 | 10/16/1990 | 09/15/1999 | 09/15/2005 | 08/04/2010 | 08/15/2014 |
| 144 | 031 | 09/26/1992 | 08/07/2000 | 08/24/2006 | 08/08/2009 | 08/22/2014 |
| 144 | 034 | 10/12/1992 | 11/14/2001 | 09/06/2005 | 09/25/2009 | 08/22/2014 |
| 145 | 031 | 09/25/1989 | 08/01/2001 | 08/25/2004 | 07/30/2009 | 09/30/2014 |
| 145 | 032 | 08/08/1989 | 06/30/2001 | 07/30/2006 | 07/17/2010 | 09/14/2014 |
| 145 | 034 | 10/17/1991 | 09/13/1999 | 08/31/2006 | 09/16/2009 | 09/30/2014 |
| 145 | 035 | 11/15/1990 | 10/31/1999 | 10/18/2006 | 08/15/2009 | 09/30/2014 |
| 146 | 031 | 07/06/1992 | 08/05/2000 | 08/06/2006 | 10/01/2009 | 08/20/2014 |
| 146 | 032 | 10/05/1990 | 06/08/2002 | 07/18/2005 | 07/16/2010 | 08/20/2014 |
| 146 | 033 | 10/05/1990 | 10/24/2000 | 10/22/2005 | 09/15/2009 | 08/20/2014 |
| 146 | 034 | 10/05/1990 | 10/24/2000 | 09/04/2005 | 09/15/2009 | 08/20/2014 |
| 147 | 031 | 09/10/1990 | 09/13/2000 | 08/13/2006 | 09/14/2009 | 09/12/2014 |
| 147 | 032 | 10/25/1989 | 10/02/2001 | 08/10/2005 | 08/29/2009 | 08/11/2014 |
| 147 | 033 | 10/09/1989 | 10/29/1999 | 09/30/2006 | 08/29/2009 | 07/26/2014 |
| 147 | 034 | 10/09/1989 | 09/29/2000 | 09/08/2004 | 08/29/2009 | 09/28/2014 |
| 148 | 032 | 07/31/1990 | 09/18/1999 | 09/05/2006 | 07/11/2009 | 09/19/2014 |
| 148 | 033 | 07/31/1990 | 09/18/1999 | 10/07/2006 | 08/23/2010 | 09/19/2014 |
| 148 | 034 | 06/29/1990 | 06/30/1999 | 08/14/2004 | 08/12/2009 | 09/19/2014 |
| 149 | 032 | 10/10/1990 | 09/09/1999 | 07/29/2007 | 07/26/2009 | 09/10/2014 |
| 149 | 033 | 07/06/1990 | 09/25/1999 | 07/26/2006 | 07/26/2009 | 09/26/2014 |
| 149 | 034 | 10/15/1992 | 09/30/2001 | 07/26/2006 | 07/18/2009 | 09/26/2014 |
